# Supplementary material for: Effect of organic matter on the performance and N2O emission of a granular sludge anammox reactor
Source: Royal Society of Chemistry journal article supplement (doi:10.1039/c8ew00125a), 2018-01-01
Supplement: c8ew00125a2.xlsx [file c8ew00125a2.xlsx]

## Sheet: Sheet 1
										Symbol	Description
										Cat	Vector describing the stoichiometry of the catabolic reaction per mol electron donor
										An	Vector describing the stoichiometry of the anabolic reaction per mol biomass formed
										Met	Vector describing the stoichiometry of the metabolic reaction per mol biomass formed
										D	Vector describing the stoichiometry of the electron donor reaction per mol electron donor
										A	Vector describing the stoichiometry of the electron acceptor reaction per mol electron acceptor
										lCat	Multiplication factor of the catabolism, i.e. the number of times the catabolic reaction needs to run to produce one C-mol of biomass
										YMetX/NH4	The biomass production per unit of ammonium in the metabolic reaction (mol C-x/mol NH4)
										YMetNO2/NH4	The mol ratio of nitrite and ammonium consumption in metabolic reaction (mol NO2/mol NH4)
													Measurement	Value	Unit	Reference	Calculated lCat	Equation
												Example 1a	YMetX/NH4	0.071	mol C-x / mol NH4	Lotti et al., 2014	13.8845	Eq. S13
												Example 1b	YMetNO2/NH4	1.146	mol NO2 / mol NH4	Lotti et al., 2014	13.9096	Eq. S17
												Example 2	YMetNO2/NH4	1.24	mol NO2 / mol NH4	This study	8.38333	Eq. S17
	Biomass composition	x	y	z
	CHxOyNz	1.74	0.31	0.2			Step 1: Catabolism			Step 2. Anabolism			Step 3: Metabolism (Example 1)		Step 3: Metabolism (Example 2)		Step 3: Metabolism (Example 3)
							Corresponding equation in SI_Word_Anammox stoichiometry
							Eq. S1	Eq. S2	Eq. S3	Eq. S5	Eq. S7	Eq. S8	Eq. S11	Eq. S16	Eq. S11	Eq. S16	Eq. S11	Eq. 19
Compounds	Formula	C	H	O	N	Ch	D	A	Cat	A*	D*	An	per C-mol biomass	per mol NH4	per C-mol biomass	per mol NH4	per C-mol biomass	per mol NH4
nitrite	NO2-1	0	0	2	1	-1	0	-1	-1	0	-1	-2.26	-16.1445	-1.14626	-16.1696	-1.146	-10.6433	-1.24
nitrate	NO3-1	0	0	3	1	-1	0	0	0	0	1	2.26	2.26	0.16046	2.26	0.160175	2.26	0.263301
bicarbonate	HCO3-1	1	1	3	0	-1	0	0	0	-1	0	-1	-1	-0.071	-1	-0.0708738	-1	-0.116505
ammonium	NH4+1	0	4	0	1	1	-1	0	-1	-0.2	0	-0.2	-14.0845	-1	-14.1096	-1	-8.58333	-1
nitrogen	N2	0	0	0	2	0	0.5	0.5	1	0	0	0	13.8845	0.9858	13.9096	0.985825	8.38333	0.976699
biomass	CHxOyNz	1	1.74	0.31	0.2	0	0	0	0	1	0	1	1	0.071	1	0.0708738	1	0.116505
water	H2O	0	2	1	0	0	0	2	2	2.69	-1	0.43	28.199	2.00213	28.2492	2.00213	17.1967	2.0035
proton	H+1	0	1	0	0	1	4	-4	0	-5.32	2	-0.8	-0.8	-0.0568	-0.8	-0.056699	-0.8	-0.0932039
electron	e-1	0	0	0	0	-1	3	-3	0	-4.52	2	0	0	0	0	0	0	0
					Check balance	C-bal	0	0	0	0	0	0	0	0	0	0	0	0
						H-bal	0	0	0	0	0	-4.44089e-16	4.44089e-15	8.67362e-16	4.44089e-15	3.95517e-16	4.44089e-15	2.77556e-16
						O-bal	0	0	0	0	0	3.88578e-16	0	0	0	4.44089e-16	0	0
						N-bal	0	0	0	0	0	0	7.21645e-16	8.67362e-18	7.21645e-16	1.38778e-17	7.21645e-16	4.85723e-17
						e-bal	0	0	0	0	0	2.22045e-16	8.88178e-16	-2.08167e-17	8.88178e-16	-4.85723e-17	8.88178e-16	5.55112e-17
References:
Lotti, T., et al. (2014). "Physiological and kinetic characterization of a suspended cell anammox culture." Water Research 60(0): 1-14.
Kleerebezem, R. and M. C. Van Loosdrecht (2010). "A generalized method for thermodynamic state analysis of environmental systems." Critical Reviews in Environmental Science and Technology 40(1): 1-54.

## Sheet: Sheet 2
Step 1: Stoichiometric matrix of possible processes
Aij	i component →	SS	SNH	SNO2	SNO3	SN2	XAN	XH	XI	Procee rate							Aij	i component →	SS	SNH	SNO2	SNO3	SN2	XAN	XH	XI	Procee rate
j process ↓		[gCOD.m‑3]	[gN.m‑3]	[gN.m‑3]	[gN.m‑3]	[gN.m‑3]	[gCOD. m‑3]	[gCOD.m‑3]	[gCOD. m‑3]	[gCOD. m‑3.d-1]		Parameter	Value	Unit	Source		j process ↓		[gCOD.m‑3]	[gN.m‑3]	[gN.m‑3]	[gN.m‑3]	[gN.m‑3]	[gCOD. m‑3]	[gCOD.m‑3]	[gCOD. m‑3]	[gCOD. m‑3.d-1]
		Expression	Expression	Expression	Expression	Expression	Expression	Expression	Expression				0.301	g COD.g-1 N	This study				Value	Value	Value	Value	Value	Value	Value	Value
1. Anammox					1/1.14	2*(	1			ρ1		YH, NO2	0.53	g COD.g-1 COD	[4]		1. Anammox			-3.32226	-4.12245	0.877193	6.49052	1			ρ1
2. Decay of anammox		1-fI	iNXB,AN- - fI iNXI – (1-fI) iNSS				-1		fI	ρ2		YH, NO3	0.53	g COD.g-1 COD	[4]		2. Decay of anammox		0.92	0.0438				-1		0.08	ρ2
3. Denitritation			-iNXB+1/ YH. iNSS					1		ρ3		i_NXB_AN	0.077	g N.g-1 COD	[2]		3. Denitritation		-1.88679	-0.0263962	-0.518592		0.518592		1		ρ3
4. Partial Denitrification			-iNXB+1/ YH. iNSS					1		ρ4		i_NXB_H	0.083	g N.g-1 COD	[1]		4. Partial Denitrification		-1.88679	-0.0263962	0.777888	-0.777888			1		ρ4
5. Decay of heterotrophs		1-fI	iNXB - fI iNXI – (1-fI) iNSS					-1	fI	ρ5		iNXI	0.07	g N.g-1 COD	[1]		5. Decay of heterotrophs		0.92	0.0498					-1	0.08	ρ5
gCOD/unit comp		1	0	-3.43	-4.57	-1.715	1	1	1			iNSS	0.03	g N.g-1 COD	[3]		gCOD/unit comp		1	0	-3.43	-4.57	-1.715	1	1	1
gN/unit comp		iNSS	1	1	1	1	iNXB	iNXB	iNXI			fI	0.08	g COD.g-1 COD	[3]		gN/unit comp		iNSS	1	1	1	1	iNXB	iNXB	iNXI
Step 2: Mass balance set-up and calculation
														Process rate of decay of Anammox (ρ2)				Reactor operation			Measurement		ΔC*	Unit	-ΔC*Q/V	Unit
														Measured VSS	2.7	g VSS/L		Q (m3/d)	0.0065		1	Ss(COD)	12	[gCOD.m‑3]	-12	[gCOD.m‑3.d-1]
														Unit convertion	3.6	g COD/L		V (m3)	0.0065		2	NH4-N	137.6	[gN.m‑3]	-137.6	[gN.m‑3.d-1]
														b_AN	0.003	d-1		HRT:V/Q (d)	1		3	NO2-N	169	[gN.m‑3]	-169	[gN.m‑3.d-1]
														Procee rate	10.8	gCOD.m‑3.d-1					4	NO3-N	-30	[gN.m‑3]	30	[gN.m‑3.d-1]
																		*Note: ΔC was taken from the average values of measurement from day 362-383. For COD, it should be in the range of 0-40 mgCOD/L
				Solution:													Equation systems:
					r' = A'*ρ'													r = A*𝝆							=	-ΔC*Q/V
					A'					ρ'		r'						A						ρ		r
					0	-1.88679	-1.88679	0.92		ρ1		-21.936	Ss(COD)					0	0.92	-1.88679	-1.88679	0.92		ρ1		-12	Ss(COD)
					-3.32226	-0.0263962	-0.0263962	0.0498	*	ρ3	=	-138.073	NH4-N					-3.32226	0.0438	-0.0263962	-0.0263962	0.0498	*	ρ2	=	-137.6	NH4-N
					-4.12245	-0.518592	0.777888	0		ρ4		-169	NO2-N					-4.12245	0	-0.518592	0.777888	0		ρ3		-169	NO2-N
					0.877193	0	-0.777888	0		ρ5		30	NO3-N					0.877193	0	0	-0.777888	0		ρ4		30	NO3-N
																								ρ5
				To solve							To check
					(A’)-1					ρ'=(A')-1*r'
					0.0145873	-0.269484	-0.0393562	-0.0655936		41.5718		-21.936
					-0.0912846	1.68638	-1.68201	-1.51782		7.8842		-138.073
					0.0164495	-0.303886	-0.0443803	-1.3595		8.3129		-169
					0.93348	2.83531	-3.5406	-5.90099		9.37452		30
Step 3: Brief summary of the results
	Process rates:
		unit	P1: Anammox	P2: Decay of anammox	P3: Denitritation	P4: Partial DEN	P5: Decay of H
	Process rate	[gCOD.m‑3.d-1]	41.5718	10.8	7.8842	8.3129	9.37452
	Conversion rates:
		unit	P1: Anammox	P2: Decay of anammox	P3: Denitritation	P4: Partial DEN	P5: Decay of H	SUM (-ΔC*Q/V )
	Ss	[gCOD.m‑3.d-1]	0	9.936	-14.8758	-15.6847	8.62456	-12
	NH4	[g N m‑3 d-1]	-138.112	0.47304	-0.208113	-0.219429	0.466851	-137.6
	NO2	[g N m‑3 d-1]	-171.378	0	-4.08868	6.46651	0	-169
	NO3	[g N m‑3 d-1]	36.4665	0	0	-6.46651	0	30
